# Supplementary material for: Effects of Extra Virgin Olive Oil Polyphenols on Beta-Cell Function and Survival
Source: Plants (Basel). 2021 Feb 3;10(2):286. doi: 10.3390/plants10020286 (PMC7913337; doi:10.3390/plants10020286)
Supplement: Supplementary file 1 [file plants-10-00286-s001.xlsx]

## Sheet: Fig 1A proliferation
	PROLIFERATION
	Ki-67 RAW DATA
	Data set	1	2	3	4	MEAN	SD	T-TEST
	DMSO	1	1	1	1	1	0
	C1	1.32144	1.26628	1.28901	1.59726	1.3685	0.154177	0.00306225
	C2	1.85569	1.38634	1.57268	1.60349	1.60455	0.192959	0.00076722
	C3	0.910856	0.991352	1.33234	0.594574	0.95728	0.303063	0.787476
	C4	1.55002	2.02427	1.42832	2.0062	1.75221	0.307847	0.00274706
	C5	0.778512	1.50151	1.62509	0.604852	1.12749	0.510695	0.635359
	C6	0.84952	1.4785	1.16453	0.678786	1.04283	0.353326	0.816497
	C7	1.05158	1.42363	1.20513	1.25831	1.23466	0.153468	0.0222784
	C8	1.0606	0.758317	0.697946	0.688046	0.801227	0.175681	0.0642929
	C9	0.893369	0.936013	0.861275	0.986345	0.919251	0.0542021	0.0246504
	C10	0.957723	1.14461	1.21646	0.752545	1.01784	0.20778	0.869333
	C11	0.797096	1.48965	0.811823	0.391757	0.872581	0.455102	0.595779
	C12	1.26329	1.21487	1.34888	1.28888	1.27898	0.055798	5.79347e-05

## Sheet: Fig 1B apoptosis
	APOPTOSIS
	RAW DATA (ABSORBANCE)												FOLD CHANGE
	Data set	1	2	3	4	5	6	7	MEAN	SD	T-TEST		Data set	1	2	3	4	5	6	7	MEAN	SD	T-TEST
	DMSO	1.4	0.8	2.1	2.45	0.76	0.52	1.59	1.37429	0.726633			DMSO	100	100	100	100	100	100	100	100	8.20464e-15
	C1	0.794382	0.546457	1.84957	2.94907	0.946275	0.495568	1.37633	1.27967	0.877508	0.829774		C1	56.7416	68.3071	88.075	120.37	124.51	95.3015	86.5618	91.4096	24.8988	0.379313
	C2	0.967416	1.15748	1.82095	3.53889	0.849412	0.607053	1.68717	1.51834	0.992836	0.762044		C2	69.1011	144.685	86.7121	144.444	111.765	116.741	106.111	111.366	27.8542	0.301553
	C3	2.12745	1.38583	2.33969	5.46713	1.25922	0.585022	2.29639	2.20868	1.57394	0.226981		C3	151.961	173.228	111.414	223.148	165.686	112.504	144.427	154.624	38.5493	0.00277597
	C4	2.21798	1.30079	2.9375	3.64052	0.968627	0.573166	2.17408	1.97324	1.09784	0.251922		C4	158.427	162.598	139.881	148.593	127.451	110.224	136.735	140.558	18.1505	7.11836e-05
	C5	2.96161	1.09764	3.93848	6.51065	1.84784	1.08629	3.27069	2.95903	1.9095	0.0626268		C5	211.543	137.205	187.547	265.741	243.137	208.902	205.704	208.54	40.8565	1.37786e-05
	C6	1.05393	1.13386	1.79949	3.62963	0.588627	0.579545	1.57767	1.48039	1.05192	0.829888		C6	75.2809	141.732	85.6899	148.148	77.451	111.451	99.2242	105.568	29.7175	0.629034
	C7	0.747191	1.02835	2.25383	3.76574	0.797255	0.523552	1.88706	1.57185	1.15845	0.70896		C7	53.3708	128.543	107.325	153.704	104.902	100.683	118.683	109.602	30.7001	0.424119
	C8	0.975281	0.76063	2.71533	3.26667	0.774902	0.559225	1.64934	1.52877	1.06829	0.757171		C8	69.6629	95.0787	129.302	133.333	101.961	107.543	103.732	105.802	21.4215	0.487346
	C9	0.94382	0.76063	1.63135	4.17407	0.689192	0.427892	2.41121	1.57688	1.33039	0.729776		C9	67.4157	95.0787	77.6831	170.37	90.6831	82.287	151.648	105.024	39.6388	0.743173
	C10	0.707865	0.977953	2.04276	1.9963	1.00588	0.493961	2.32884	1.36479	0.73668	0.981036		C10	50.5618	122.244	97.2743	81.4815	132.353	94.9925	146.468	103.625	32.7322	0.77452
	C11	1.59942	1.01417	2.01056	2.76074	1.1698	0.377758	1.88828	1.54582	0.774658	0.676733		C11	114.244	126.772	95.7411	112.683	153.922	72.6457	118.76	113.538	25.2434	0.181368
	C12	1.04607	0.633071	2.3075	4.55972	0.767451	0.607992	1.6676	1.65563	1.42375	0.649785		C12	74.7191	79.1339	109.881	186.111	100.98	116.922	104.881	110.375	36.8439	0.470582

## Sheet: Fig 2A insulin mRNA expression
	INSULIN mRNA EXPRESSION
	Ins1 RAW DATA										Ins2 RAW DATA
	Data set	1	2	3	4	MEAN	SD	T-TEST			Data set	1	2	3	4	MEAN	SD	T-TEST
	DMSO	1	1	1	1	1	0				DMSO	1	1	1	1	1	0
	C1	1.33523	1.27067	1.58778	1.40423	1.39948	0.13687	0.00111364			C1	1.03523	1.27067	0.690415	1.26628	1.06565	0.27326	0.647902
	C2	1.56447	1.3852	1.46809	1.82198	1.55993	0.189436	0.00104251			C2	0.950157	1.2852	1.03736	1.38634	1.16477	0.204849	0.158816
	C3	0.724106	0.829524	1.38594	0.791548	0.932778	0.305234	0.67503			C3	0.724106	0.829524	0.910856	0.991352	0.863959	0.11427	0.0546907
	C4	0.868745	1.05069	1.18735	1.03046	1.03431	0.130532	0.617939			C4	0.868745	1.05069	1.05002	0.910856	0.97008	0.0942793	0.549038
	C5	1.13457	0.965675	1.71667	0.737854	1.13869	0.418203	0.531793			C5	1.13457	0.965675	0.778512	1.50151	1.09507	0.307518	0.559112
	C6	0.866335	1.22677	0.996186	0.865343	0.988658	0.170218	0.89834			C6	0.866335	1.22677	0.84952	1.4785	1.10528	0.303623	0.513934
	C7	0.981048	1.40529	1.02126	0.68448	1.02302	0.295806	0.881427			C7	0.981048	1.40529	1.05158	1.42363	1.21539	0.231786	0.112457
	C8	1.13486	1.19304	1.08385	0.986166	1.09948	0.0877314	0.063857			C8	1.13486	1.19304	1.0606	0.797096	1.0464	0.174818	0.614598
	C9	1.05423	0.541938	0.93447	1.19619	0.931705	0.281003	0.644151			C9	1.05423	0.541938	0.893369	1.52006	1.0024	0.406026	0.990957
	C10	1.41856	1.21447	1.23056	0.980744	1.21108	0.179346	0.056752			C10	1.41856	1.21447	0.957723	1.54461	1.28384	0.256462	0.0688084
	C11	1.05126	1.03612	1.7174	0.645326	1.11252	0.444873	0.63099			C11	1.05126	1.03612	0.797096	1.48965	1.09353	0.288598	0.540873
	C12	1.51306	1.38058	1.38448	1.25503	1.38329	0.105355	0.000343059			C12	1.03523	1.03046	0.737854	1.15503	0.989642	0.177477	0.910886

## Sheet: Fig 2B insulin content
	INSULIN CONTENT (ng/microg protein)
	RAW DATA												FOLD CHANGE
	Data set	1	2	3	4	5	6	7	MEAN	SD	T-TEST		Data set	1	2	3	4	5	6	7	MEAN	SD	T-TEST
	DMSO	25500	22110	15200	18900	32100	12700	10900	19630	7533.3			DMSO	100	100	100	100	100	100	100	100	0
	C1	49598.9	43168.6	43521.6	37895.7				43546.2	4785.62	0.000389539		C1	194.506	195.245	286.326	200.507				219.146	44.8665	0.00181047
	C2	51252.7	47832.6	28232.1	35923.1				40810.1	10652.9	0.0122746		C2	200.991	216.339	185.737	190.07				198.284	13.6409	6.99491e-06
	C3	33605.9	33202.3	13139.1	15384.6	66682.9	13121.2	10932	26581.1	20138.9	0.409125		C3	131.788	150.168	86.4412	81.3998	207.735	103.317	100.294	123.02	44.657	0.197645
	C4	25934.9	52153.4	19032.8	22110.7	68662	11837.5	10831.5	30080.4	21915.9	0.255891		C4	101.706	235.882	125.216	116.988	213.9	93.2084	99.3719	140.896	58.7418	0.090317
	C5	17106.5	33652.7	13831	19072.1				20915.6	8762.29	0.923957		C5	67.0844	152.206	90.9933	100.911				102.799	35.8678	0.881113
	C6	46260	34129.8	21533.6	28696.1	60408.1			38205.5	15352.7	0.0718973		C6	181.412	154.364	141.669	151.831	188.187			163.492	20.1652	0.000108185
	C7	49664.3	60342.8	41744.8	47263.1				49753.8	7799.21	0.000606888		C7	194.762	272.921	274.637	250.07				248.097	37.2786	0.000211336
	C8	45622.5	32624.4	24981.5	36542.5				34942.7	8587.17	0.0237632		C8	178.912	147.555	164.352	193.347				171.041	19.6285	0.00035287
	C9	30573	24795.4	12579.8	15203.2	42972.1	13575	10633	21475.9	11932.7	0.735271		C9	119.894	112.146	82.7618	80.44	133.869	106.89	97.5503	104.793	19.4201	0.526071
	C10	51464.7	39710	25682.9	24123.1	39764.2			36149	11341.1	0.0510269		C10	201.822	179.602	168.966	127.635	123.876			160.38	33.784	0.0039696
	C11	32586.3	32227.8	24035.5	30511.3	38519.5			31576.1	5187.73	0.0447166		C11	127.789	145.761	158.128	161.436	119.998			142.623	18.2763	0.000807691
	C12	29813.7	35201.5	19498.3	24660.6	36337.2	16110.7		26937	8278.48	0.217913		C12	116.916	159.211	128.278	130.479	113.2	126.856		129.157	16.2204	0.00132875

## Sheet: Fig 2C insulin in medium
	INSULIN RELEASED IN COLTURE MEDIUM (ng/microg protein)
	RAW DATA												FOLD CHANGE
	Data set	1	2	3	4	5	6	7	MEAN	SD	T-TEST		Data set	1	2	3	4	5	6	7	MEAN	SD	T-TEST
	DMSO	16.26	14.44	9.28	11.29	19.72	8.74	7.55	12.4686	4.48136			DMSO	100	100	100	100	100	100	100	100	0
	C1	16.16	14.32	10.53	12.21				13.305	2.45499	0.81443		C1	99.385	99.169	113.47	108.149				105.043	7.00416	0.199922
	C2	15.98	16.32	10.11	9.35				12.94	3.72214	0.96144		C2	98.278	113.019	108.944	82.8167				100.764	13.4832	0.913413
	C3	16.76	10.22	7.98	13.87	19.9	10.11	9.23	12.5814	4.41157	0.96291		C3	103.075	70.7756	85.9914	122.852	100.913	115.675	122.252	103.076	19.3968	0.68219
	C4	17.01	12.37	10.55	12.91	17.92	8.93	7.87	12.5086	3.82721	0.985968		C4	104.613	85.6648	113.685	114.349	90.8722	102.174	104.238	102.228	10.7332	0.592933
	C5	15.88	14.01	9.98	12.04				12.9775	2.53998	0.93927		C5	97.663	97.0222	107.543	106.643				102.218	5.6475	0.462087
	C6	16.26	14	12.98	16.95	14.65			14.968	1.62695	0.706843		C6	100	96.9529	139.871	150.133	74.2901			112.249	31.7137	0.412911
	C7	16.66	12.09	12.97	19.09				15.2025	3.26132	0.331723		C7	102.46	83.7258	139.763	169.088				123.759	38.1537	0.2594
	C8	12.31	13.66	11.64	10.98				12.1475	1.14523	0.701325		C8	75.7073	94.5983	125.431	97.2542				98.2477	20.5046	0.869907
	C9	10.2	18.98	15.54	11.77	19.52	8.88	10.73	13.66	4.34268	0.62261		C9	62.7306	131.44	167.457	104.252	98.9858	101.602	142.119	115.512	34.252	0.253958
	C10	19.29	12	9.36	8.92	18.93			13.7	5.07875	0.868849		C10	118.635	83.1025	100.862	79.008	95.9939			95.5202	15.7313	0.542067
	C11	16.24	10.43	12.98	8.72	17.24			13.122	3.65118	0.673061		C11	99.877	72.2299	139.871	77.2365	87.4239			95.3276	27.0557	0.709446
	C12	14.27	14.56	13.23	10.99	17.98	13.56		14.0983	2.28103	0.691927		C12	87.7614	100.831	142.565	97.3428	91.1765	155.149		112.471	28.8284	0.31424

## Sheet: Fig 3A GSIS
	INSULIN SECRETION
	RAW DATA																	FOLD CHANGE
	Data set	1	2	3	4	5	6	7	8	9	MEDIA	SD	T-TEST vs 3 mM glucose	T-TEST vs DMSO 25 mM glucose	T-TEST vs DMSO 3 mM glucose			Data set	1	2	3	4	5	6	7	8	9	MEDIA	SD	T-TEST vs 3 mM glucose	T-TEST vs DMSO 25 mM glucose	T-TEST vs DMSO 3 mM glucose
	DMSO 3 mM glucose	14.38	12.92	19.34	26.21	9.15	13.35	13.64	29.31	35.21	19.2789	8.9194						DMSO 3 mM glucose	100	100	100	100	100	100	100	100	100	100	0
	C1	13.4521	14.0426	15.5075	24.201	8.86636	7.34092	15.04			14.0644	5.45261			0.618378			C1	93.547	108.689	80.1835	92.3351	96.9001	54.9882	110.264			90.9867	18.8898			0.230779
	C2	14.9594	17.7322	15.2475	27.3526	7.47857	8.88047	15.0126			15.2376	6.50306			0.919853			C2	104.029	137.246	78.8391	104.359	81.7331	66.5204	110.063			97.5414	23.748			0.788811
	C3	14.8133	10.2392	14.612	25.3212	8.74714	9.93868	12.0199	26.1426		15.2292	6.83175			0.563488			C3	103.013	79.2504	75.5534	96.6088	95.5972	74.447	88.1226	89.1934		87.7232	10.5099			0.00522115
	C4	13.9179	12.0223	22.4824	35.1363	5.68585	10.6694	18.7447	31.6302		18.7861	10.3711			0.740708			C4	96.7865	93.0516	116.248	134.057	62.1404	79.9208	137.425	107.916		103.443	25.8773			0.712302
	C5	15.1323	15.8395	12.5152	25.6794	9.40773	7.83355	5.56415			13.1388	6.68787			0.473898			C5	105.232	122.597	64.7117	97.9756	102.817	58.6783	40.7929			84.6863	29.9073			0.200461
	C6	24.7731	23.3443	30.6703	32.9167	7.79848	13.2287	11.8282			20.6514	9.7741			0.255026			C6	172.274	180.683	158.585	125.588	85.2293	99.0916	86.7173			129.738	40.8761			0.0782782
	C7	31.1147	13.3062	29.9773	21.8299	13.721	9.57544	12.4255	56.8392		23.5987	15.7218			0.318098			C7	216.375	102.989	155.002	83.2885	149.957	71.7262	91.0961	193.924		133.045	53.8742			0.104716
	C8	19.2557	12.7622	32.553	16.8859	12.1785					18.7271	8.26573			0.635746			C8	133.906	98.779	168.32	64.4255	133.099					119.706	39.491			0.296906
	C9	12.4074	12.8933	28.8842	30.1052	9.54522	12.4107	14.3894	31.6218		19.0321	9.37434			0.680826			C9	86.2825	99.793	149.349	114.861	104.319	92.9638	105.494	107.888		107.619	19.0511			0.276999
	C10	12.9473	11.6205	22.3594	25.0746	5.66725	9.42307	8.76577			13.694	7.26201			0.597368			C10	90.0368	89.9418	115.612	95.668	61.9372	70.5848	64.2652			84.0066	19.4226			0.0500161
	C11	15.6265	10.7809	24.9473	41.712	14.532	13.4457	27.3045			21.1927	10.926			0.248358			C11	108.669	83.4433	128.993	159.145	158.82	100.717	200.179			134.281	40.7389			0.0459116
	C12	16.8491	13.4912	22.5964	30.8714	8.69172	10.808	14.1207	34.6622	32.5464	20.5152	9.96345			0.785053			C12	117.171	104.421	116.838	117.785	94.9915	80.9586	103.524	118.261	92.4352	105.154	13.5365			0.270175
	DMSO 25mM glucose	19.9721	18.6114	29.5355	38.4924	11.1007	14.6957	16.4875	37.8369	33.3796	24.4569	10.4456	0.274755					DMSO 25mM glucose	138.888	144.051	152.717	146.861	121.319	110.08	120.876	129.092	94.8013	128.743	18.9003	0.000319652
	C1	18.4125	17.7937	26.1888	35.0549	9.23808	16.9439	22.3728			20.8578	8.14429	0.0915792	0.931925				C1	128.043	137.722	135.413	133.746	100.963	126.921	164.023			132.404	18.6036	0.00138766	0.90452
	C2	18.8193	17.9033	25.7128	34.4755	12.7639	18.3504	16.4611			20.6409	7.21917	0.166936	0.89135				C2	130.871	138.57	132.952	131.536	139.496	137.456	120.683			133.081	6.47342	0.00243937	0.94492
	C3	16.0096	30.6913	30.1363	43.3558	12.3238	21.8785	16.6051	53.484		28.0605	14.4115	0.0391198	0.467649				C3	111.332	237.549	155.824	165.417	134.686	163.884	121.739	182.477		159.113	39.7275	0.000228409	0.103572
	C4	16.3913	27.9014	58.8851	53.905	21.2028	22.5823	21.8894			31.8225	17.1772	0.0693097	0.180578				C4	113.987	215.955	304.473	205.666	231.725	169.156	160.48			200.206	60.7165	0.00228076	0.0157928
	C5	20.9644	32.5005	45.4934	30.5669	14.2843	26.999	25.7654			28.082	9.80161	0.00597712	0.211716				C5	145.789	251.552	235.229	116.623	156.113	202.24	188.896			185.206	48.8393	0.000566381	0.0208305
	C6	29.1118	17.259	36.363	30.5957	8.80916	21.7183	21.9316			23.6841	9.19662	0.561042	0.638123				C6	202.446	133.584	188.02	116.733	96.275	162.684	160.789			151.504	38.1229	0.323198	0.272943
	C7	16.8761	18.8236	18.8165	43.7131	5.94309	9.18435	14.3818	57.7889		23.1909	17.9982	0.962192	0.984008				C7	117.358	145.693	97.2932	166.78	64.9518	68.7966	105.438	197.164		120.434	46.5803	0.624289	0.479961
	C8	18.8553	19.9963	10.4245	45.3583	14.4046					21.8078	13.7023	0.678208	0.828579				C8	131.121	154.77	53.9011	173.057	157.428					134.056	47.2489	0.616428	0.766006
	C9	19.186	22.5138	38.8489	58.9244	16.0739	23.6488	14.3744	59.3335		31.613	18.5395	0.108789	0.291557				C9	133.421	174.255	200.873	224.816	175.672	177.144	105.384	202.434		174.25	38.693	0.000641121	0.0137947
	C10	16.1076	16.7781	25.821	37.8441	9.35454	13.367	17.1079			19.4829	9.50126	0.224483	0.731102				C10	112.014	129.862	133.511	144.388	102.235	100.128	125.425			121.08	16.6839	0.00239168	0.179807
	C11	20.3535	15.0134	48.8995	44.2866	10.4416	15.8605	17.8557			24.673	15.3311	0.633583	0.626891				C11	141.54	116.203	252.841	168.968	114.116	118.806	130.907			149.054	49.6136	0.553966	0.446489
	C12	18.849	24.3329	33.1887	52.3998	14.723	21.0326	14.8417	69.2787	74.605	35.9168	23.53	0.0894048	0.200424				C12	131.078	188.335	171.606	199.923	160.907	157.548	108.81	236.365	211.886	174.051	39.9094	0.000158727	0.00720311

## Sheet: Fig 3B insulin content 
	INSULIN CONTENT
	RAW DATA															FOLD CHANGE
	Data set	1	2	3	4	5	6	7	8	9	MEDIA	SD	T-TEST vs DMSO			Data set	1	2	3	4	5	6	7	8	9	MEDIA	SD	T-TEST vs DMSO
	DMSO 3 mM	20861.1	16703.6	15595.8	13460.1	47904.7	13381.5	17483	30534.5	40296.1	24024.5	12647.8				DMSO 3 mM	100	100	100	100	100	100	100	100	100	100	0
	C1	16655.1	14387.4	19200	17582.4	48120.9	21470	18621.2			22291	11599.4	0.815379			C1	79.8382	86.134	123.11	130.627	100.451	160.446	106.511			112.445	27.9372	0.261396
	C2	18521.4	13347.9	18878.1	21484.4	46402.6	23376.1				23668.4	11641.8	0.751427			C2	88.7844	79.9107	121.046	159.616	96.8646	174.69				120.152	39.1873	0.236402
	C3	17231.9	14884.9	16692.7	18740.5	44183	15686.2	23208.1	26780.6		22176	9769.99	0.973225			C3	82.603	89.1122	107.034	139.23	92.2312	117.223	132.747	87.7061		105.986	21.724	0.448757
	C4	18340.5	11153.4	14091.3	12969.3	27973.3	20686.3	14882	12367.4		16557.9	5594.27	0.260324			C4	87.917	66.7728	90.3533	96.3539	58.3936	154.589	85.1228	40.5031		85.0007	33.867	0.230845
	C5	10347.4	17716.3	12506.4	14500.8	22754.4	16647.3	21424.9			16556.8	4521.27	0.409574			C5	49.6013	106.063	80.1908	107.732	47.4994	124.406	122.547			91.1484	32.5085	0.485078
	C6	16030.2	13672	17778.5	18664	44160	24047.9	23234.1			22512.4	10237.9	0.777552			C6	76.8425	81.8508	113.996	138.662	92.1832	179.711	132.896			116.591	36.8021	0.256005
	C7	15361.8	15963.3	23380.7	12511.4	48961.4	27746.9	17815.7	39151.3		25111.6	12909.7	0.622181			C7	73.6383	95.5682	149.917	92.9518	102.206	207.353	101.903	128.22		118.97	42.6056	0.228506
	C8	23840.7	15801.1	15542	20906.7	39840.6					23186.2	9949.45	0.972005			C8	114.283	94.5971	99.6554	155.324	83.1664					109.405	27.9961	0.474051
	C9	13761.2	16474.5	11019.8	11646.7	26750.4	21236.6	15384.2	21230		17187.9	5456.65	0.315205			C9	65.9657	98.6289	70.659	86.5282	55.8409	158.701	87.995	69.5278		86.7308	32.2104	0.263416
	C10	16655.1	14387.4	19200	17582.4	48120.9	21470	18621.2			22291	11599.4	0.815379			C10	79.8382	86.134	123.11	130.627	100.451	160.446	106.511			112.445	27.9372	0.261396
	C11	19347.4	20716.3	18506.4	14500.8	42754.4	16647.3	21424.9			21985.4	9459.17	0.838786			C11	92.7438	124.023	118.663	107.732	89.249	124.406	122.547			111.338	15.0424	0.0693653
	C12	14804	12996.4	12754.5	18069.8	38472.1	15766.9	11887.8	24289	23593.9	19181.6	8533.01	0.355134			C12	70.9648	77.8062	81.7818	134.247	80.3096	117.826	67.9966	79.5462	58.5513	85.4478	24.4963	0.0937064

## Sheet: Fig 3C human islets
	INSULIN SECRETION
	RAW DATA									FOLD CHANGE
	Dara set	1	2	3	Mean	SD	T-TEST vs 3 mM	T-TEST vs 25 mM		Dara set	1	2	3	Mean	SD	T-TEST vs 3 mM	T-TEST vs 25 mM
	DMSO 3 mM glucose	19.4658	18.4209	15.4288	17.7719	2.09534				DMSO 3 mM glucose	100	100	100	100	0
	Mix 3 mM	19.0208	18.6527	15.9983	17.8906	1.64907				Mix 3 mM	97.7136	101.258	103.691	100.888	3.00611
	DMSO 25 mM glucose	33.0472	28.163	21.8632	27.6912	5.60691	0.0454537			DMSO 25 mM	169.77	152.886	141.704	154.787	14.1293	0.00255903
	Mix 25 mM	46.5187	35.8933	40.7689	41.0603	5.31869	0.0019651	0.0400883		Mix 25 mM glucose	238.976	194.851	264.24	232.689	35.1192	0.00292886	0.0234931
								DMSO
								C1-C2-C12

## Sheet: Fig 4
	RAW DATA
	P-AKT						P-AKT/AKT									Fold Change
	Data set	1	2	3	4		Data set	1	2	3	4	MEAN	SD	T-TEST		Data set	1	2	3	4	MEAN	SD	T-TEST
	DMSO	2388	1552	470	1437		DMSO	0.5	0.440034	0.370079	0.565748	0.468965	0.0835576			DMSO	100	100	100	100	100	0
	C12 5'	3369	1973	653	1643		C12 5'	0.67637	0.520306	0.430455	0.707885	0.583754	0.131037	0.190084		C12 5'	135.274	118.242	116.314	125.124	123.739	8.5696	0.00145932
	C12 15'	3601	2118	929	1855		C12 15'	0.865417	0.542382	0.536684	0.780395	0.681219	0.167263	0.0636304		C12 15'	173.083	123.259	145.019	137.94	144.825	20.905	0.00515744
	C12 30'	3483	3338	1013	2121		C12 30'	0.847239	0.884473	0.646458	0.748412	0.781646	0.106858	0.00365288		C12 30'	169.448	201.001	174.681	132.287	169.354	28.3071	0.0027105
	AKT
	Data set	1	2	3	4
	DMSO	4776	3527	1270	2540													0
	C12 5'	4981	3792	1517	2321													5
	C12 15'	4161	3905	1731	2377													15
	C12 30'	4111	3774	1567	2834													30
	P-CREB						P-CREB/CREB									Fold Change
	Data set	1	2	3	4		Data set	1	2	3	4	MEAN	SD	T-TEST		Data set	1	2	3	4	MEAN	SD	T-TEST
	DMSO	15304	13753	3045	758		DMSO	4.42952	5.35344	2.73094	0.767984	3.32047	2.01872			DMSO	100	100	100	100	100	0
	C12 5'	18539	10931	3019	701		C12 5'	4.53165	4.25994	2.27677	0.726425	2.9487	1.79026	0.79212		C12 5'	102.306	79.5738	83.3695	94.5886	89.9594	10.4107	0.102
	C12 15'	29797	20616	4869	967		C12 15'	7.72543	7.82688	3.97794	1.03533	5.1414	3.27121	0.380003		C12 15'	174.408	146.203	145.662	134.812	150.271	16.9251	0.00101632
	C12 30'	30356	20501	4876	1123		C12 30'	8.30534	7.88197	3.93543	1.12525	5.312	3.41509	0.354131		C12 30'	187.5	147.232	144.105	146.52	156.339	20.8166	0.00164376
	CREB
	Data set	1	2	3	4
	DMSO	3455	2569	1115	987						100	102.306	174.408	187.5
	C12 5'	4091	2566	1326	965						100	79.5738	146.203	147.232
	C12 15'	3857	2634	1224	934						100	83.3695	145.662	144.105
	C12 30'	3655	2601	1239	998						100	94.5886	134.812	146.52
	B-ACTIN
	Data set	1	2	3	4
	DMSO	42756	45693	36983	32211
	C12 5'	44523	47234	39982	30946
	C12 15'	40576	48982	40821	30897
	C12 30'	40319	48001	39231	38927
